1  
2  
3  
4  
5  
6  
7  
8  
9  
10  
11  
12  
13  
14  
15  
16  
17  
18  
19  
20  
21  
22  
23  
24  
25

**Increased academic performance and prolonged career duration among principal investigators in ecology and evolutionary biology in Taiwan**

Gen-Chang Hsu<sup>1</sup>, Wei-Jiun Lin<sup>2</sup>, Syuan-Jyun Sun<sup>3,4\*</sup>

<sup>1</sup>Department of Life Science, National Taiwan University, Taipei, Taiwan

<sup>2</sup>Institute of Ecology and Evolutionary Biology, National Taiwan University, Taipei, Taiwan

<sup>3</sup>Department of Ecology & Evolutionary Biology, University of Michigan, Ann Arbor, MI 48109, USA

<sup>4</sup>International Degree Program in Climate Change and Sustainable Development, National Taiwan University, Taipei 10617, Taiwan

ORCID iD

Gen-Chang Hsu: 0000-0002-6607-4382

Syuan-Jyun Sun: 0000-0002-7859-9346

\*Corresponding author: Syuan-Jyun Sun; email: [sjs243@ntu.edu.tw](mailto:sjs243@ntu.edu.tw)

**Acknowledgements**

We thank Ming-Yang Megan Chang for constructive discussion and comments. S.-J. S. was supported by National Taiwan University and Ministry of Science and Technology, Taiwan (111WXA0310022).

26 **Abstract**

27 Academic job markets have become increasingly challenging worldwide, yet it remains  
28 poorly characterized how competitively-successful candidates should be and what the  
29 underlying determinants of their success are. Focusing on the field of ecology and  
30 evolutionary biology, we analyzed the academic performance (measured as h-index)  
31 as well as the duration before recruitment as a new faculty member and promotion to  
32 full professor of 145 principal investigators (PI) over the past 34 years in Taiwan. We  
33 found that PIs had higher performance and longer duration before recruitment more  
34 recently. Performance before promotion remained stable, whereas the duration  
35 increased over time. The origin and prestige of doctorate had no effect on the  
36 performance or duration either before recruitment or before promotion. We also found  
37 that the difference in performance before and after recruitment (“After” performance  
38 — “Before” performance) decreased in recent years, with PIs recruited in earlier years  
39 maintaining their performance after recruitment while those recruited in later years  
40 exhibiting a performance drop. While PIs performed equally well before and after  
41 recruitment irrespective of doctorate origin, those with domestic PhD degrees showed  
42 a decrease in performance after promotion compared to their counterparts with foreign  
43 degrees. Taken together, our findings reveal a prolonged career duration for  
44 researchers as a result of intensifying competition in academia, and highlight the  
45 increasingly crucial role of academic performance, rather than PhD degree itself, in  
46 determining academic success.

47

48 **Keywords**

49 academic job market, academic performance, career duration, principal investigator,  
50 publication, h-index

## 51 **Introduction**

52 The academic job market has been increasingly competitive in many fields of science,  
53 technology, engineering, and mathematics (STEM) (Cyranoski et al. 2011;  
54 Ghaffarzadegan et al. 2015; Xue and Larson 2015), with more PhDs produced but  
55 vacancies for tenure-track academic positions remaining relatively constant over the  
56 past four decades (Larson et al. 2014; Schillebeeckx et al. 2013). For example, in the  
57 US, only 7.6% of new PhDs in life sciences landed tenure-track positions within three  
58 years after graduation in 2010. Such a surplus of PhD supply has also emerged in  
59 other STEM fields ([NSF] National Science Foundation 2018).

60

61 The intensifying competition for tenure-track positions, due to disproportionately high  
62 numbers of applicants per position (Larson et al. 2014), has resulted in higher  
63 expectations for academic performance shaped by a “*publish or perish*” culture  
64 (Garfield 1996). A survey of evolutionary biologists recruited as junior researchers at  
65 the National Centre for Scientific Research (CNRS) in France showed that academics  
66 recruited in 2013 published nearly twice as many papers as those recruited in 2005  
67 did (Brischoux and Angelier 2015). Additionally, although the minimum education  
68 requirement for a tenure-track position is having a PhD degree, it has become  
69 increasingly frequent for applicants to have one or even more postdoctoral  
70 appointments. Consequently, many PhDs in STEM work as postdoctoral researchers  
71 for a prolonged period of time and wait for future opportunities until they are  
72 competitive enough in the academic job market (Swihart et al. 2016), whereas some  
73 turn to alternative careers outside academia. In the aforementioned CNRS example,  
74 Brischoux and Angelier (2015) also found that the time between first publication and  
75 recruitment had increased from 3.25 to 8.0 years. The increase in postdoctoral training

76 time can be detrimental to not only the scientific community but also individuals  
77 because this increases the age at which researchers become independent, and they  
78 have to trade off families for research, with fixed-term and relatively low-paying jobs  
79 (Acton et al. 2019).

80

81 Despite widely claimed that publication expectations and career duration have surged,  
82 empirical quantification of the determinants regarding the change in academic profiles  
83 over time remains understudied. In addition to research productivity, which directly  
84 predicts the success of recruitment (van Dijk et al. 2014), the origin and prestige of  
85 doctoral-granting institutes are critical indicators for academic employment as well  
86 (van Dijk et al. 2014), especially in East Asian countries (Shin and Kehm 2013). With  
87 the initiative to build world-class universities, many East Asian universities  
88 preferentially recruit returnees who obtained PhD degrees from top-ranking  
89 universities in Western countries. Hence, competition for limited tenure-track positions  
90 is exacerbated when foreign PhDs are favored, leaving domestically-trained PhDs  
91 deprived of career development opportunities (Chen 2021). Yet, whether and to what  
92 extent publication expectations and career duration differ between domestic and  
93 foreign PhDs, and if their academic productivities vary between pre- and post-  
94 employment, remain largely unexplored.

95

96 In this study, we examined how academic performance as well as duration before  
97 recruitment as a new principal investigator (PI) and promotion to full professor  
98 changed over time, and how PhD university origin, PhD university ranking, and gender  
99 affected the career success. Specifically, we tested the following questions: (1) Is the  
100 academic performance for recruitment or promotion associated with the year of

101 recruitment, PhD university origin, ranking, and gender? (2) Is the duration before  
102 recruitment or promotion affected by the year of recruitment, academic performance,  
103 PhD university origin, ranking, and gender? (3) Does the academic performance of  
104 PIs differ before and after recruitment or promotion? To address these questions, we  
105 analyzed the data on 145 faculty members in the field of ecology and evolutionary  
106 biology in Taiwan between 1987 and 2021. We aim to provide empirical evidence to  
107 illustrate the temporal variations in researchers' publication performance necessary to  
108 secure a faculty position and get a promotion, the role of PhD university and gender  
109 in determining the success of academic employment, and how these factors contribute  
110 to PIs' future academic performance.

111

112

## 113 **Materials and Methods**

### 114 *Data collection*

115 Between November and December, 2021, we surveyed tenure-track faculty members  
116 at seven universities in Taiwan, all of which were qualified as research-intensive  
117 universities and ranked top 150 in Asia according to 2022 QS Asia University Rankings  
118 (<https://www.topuniversities.com/>). We also surveyed academics from Academia  
119 Sinica, a leading academic institution in Taiwan. Together, these eight institutes  
120 encompassed 34 academic departments/divisions that serve as tenure homes to the  
121 field of ecology and evolutionary biology (including ecology, evolution, biodiversity;  
122 see Appendix S1 for details). We excluded researchers in biomedical sciences  
123 because publication rates, performance, and collaboration opportunities can vary  
124 considerably among these fields (Laurance et al. 2013). A total of 145 PIs who had an  
125 updated curriculum vitae online (e.g., institutional/personal websites or Open  
126 Researcher and Contributor ID [ORCID]) were identified in our survey, with key  
127 information on the university and year of PhD completion, the year of recruitment as a  
128 new PI, the year of promotion to full professor, and gender, which is well-documented  
129 as a key determinant of performance (Witteman et al. 2019). The university ranking  
130 was determined based on 2022 QS World University Rankings. The duration before  
131 recruitment as a new PI was calculated as the time between PhD completion and  
132 landing a faculty position; the duration before promotion to full professor was  
133 calculated as the time between landing a position and getting a promotion.

134

### 135 *Measurement of academic performance*

136 We collected data on academic performance, measured as h-index (Hirsch 2005),  
137 from the Publish or Perish software using Google Scholar data, which are freely

138 available and more transparent for tenure reviews (Pauly and Stergiou 2005). We  
139 included peer-reviewed papers and book chapters regardless of authorship for  
140 calculation of h-index, while PhD theses and conference presentations were excluded.  
141 Although other matrices, such as the number of publications and citations, are also  
142 commonly used for measuring academic performance, they were both highly  
143 correlated with h-index in our study (publications:  $r = 0.91$ ,  $p < 0.001$ ; citations:  $r = 0.77$ ,  
144  $p < 0.001$ ), which had also been found in previous studies (Laurance et al. 2013; Ryan  
145 Haley 2012). We thus focused on h-index, a widely accepted measure of academic  
146 success that incorporates the assessment of quantity (number of papers) and quality  
147 (citations) of publications (Glänzel 2006).

148

149 We calculated h-index within the five-year interval both before and after the year of  
150 recruitment and promotion, generating up to four h-indexes for each PI. We used the  
151 duration of five years because this time span is commonly used by institutes to  
152 evaluate the most recent academic performance both for recruiting a new PI and for  
153 promotion to full professor. The publications and citations during the year of  
154 recruitment and promotion were considered as the performance before recruitment  
155 and promotion because these publications, either as published papers or manuscripts  
156 “accepted” or “in press”, would most likely contribute to the evaluation of academic  
157 performance prior to successful recruitment and promotion. For example, a PI who  
158 started a position in 2010 would have an h-index measured for publications between  
159 2006 and 2010 (i.e., “Before” h-index for recruitment), and another h-index measured  
160 for publications between 2011 and 2015 (i.e., “After” h-index for recruitment). We did  
161 not include “After” h-indexes for PIs who were recruited or promoted less than five  
162 years so that all performances have comparable duration.

163

164

### *Statistical analyses*

165 (1) Academic performance before recruitment/promotion. To examine how various  
166 factors affected the academic performance before recruitment as a new PI and  
167 promotion to full professor, we fit linear mixed-effects models (LMMs) with PhD  
168 university origin (binary variable: Taiwan vs. Foreign), PhD university ranking, year of  
169 recruitment/promotion, gender, and all single-factor interactions with year as fixed  
170 effects, the institute (department) nested within university as random effects, and the  
171 “Before” h-index for recruitment/promotion as the response.

172

173 (2) Duration before recruitment/promotion. To examine how various factors affect the  
174 duration before recruitment and promotion, we fit LMMs with PhD university origin,  
175 PhD university ranking, year of recruitment/promotion, gender, the “Before” h-index  
176 for recruitment/promotion, and all single-factor interactions with year as fixed effects,  
177 the institute (department) nested within university as random effects, and the duration  
178 before recruitment/promotion as the response.

179

180 (3) Difference in academic performance before and after recruitment/promotion. To  
181 compare the academic performance before and after recruitment and promotion, we  
182 fit LMMs with PhD university origin, PhD university ranking, year of  
183 recruitment/promotion, gender, and all single-factor interactions with year as fixed  
184 effects, the institute (department) nested within university as random effects, and the  
185 difference between “After” and “Before” h-index for recruitment/promotion (i.e., “After”  
186 h-index — “Before” h-index) as the response.

187



188 LMMs were performed using the package “lme4” (Bates et al. 2015); post-hoc pairwise  
189 comparisons were performed using the package “emmeans” (Lenth 2021). Response  
190 variables (h-index and duration before recruitment/promotion) were log-transformed  
191 prior to analyses to meet the assumption of normality. The assumption of  
192 independence and equal variance were both assessed using the residual plots. Non-  
193 significant interactions ( $p > 0.05$ ) were dropped from our final model results. All  
194 analyses were performed in R version 4.1.2 (R Development Core Team 2014).  
195

## 196 **Results**

197 In total, we collected data on 145 tenure-track faculty members, of which 44.8% were  
198 full professors, 24.8% were associate professors, and 30.3% were assistant  
199 professors. Nearly half of the PIs obtained their PhD degrees from the USA (45.5%),  
200 followed by Taiwan (33.1%), and relatively few from the UK (4.8%) and other countries  
201 (Fig. 1). The PhD universities varied widely in the ranking of prestige among 73  
202 universities from 16 countries (Fig. 2). The gender difference was substantial, with  
203 males (112) being around four times as many as females (33).

204

205 The academic performance before recruitment (“Before” h-index for recruitment) was  
206 higher for PIs who landed tenure-track positions more recently, whereas the  
207 performance for promotion to full professor (“Before” h-index for promotion) remained  
208 constant over years (Table 1, Fig. 3a–b). Although male PIs had on average higher  
209 performance than female PIs before recruitment, no such gender difference was found  
210 before promotion. PhD university origin and ranking had no effect on the performance  
211 either before recruitment or before promotion (Table 1).

212

213 PIs who landed positions more recently spent more time post-PhD before recruitment,  
214 while higher academic performance reduced this duration (Table 1, Fig. 3c). On the  
215 other hand, PIs also spent more time before promotion to full professor in recent years,  
216 yet the duration was not related to the performance (Table 1, Fig. 3d). PhD university  
217 origin, ranking, and gender had no effect on the duration either before recruitment or  
218 before promotion (Table 1).

219

220 The difference in academic performance before and after recruitment (“After” h-index  
221 — “Before” h-index) decreased for PIs who landed positions more recently, while PhD  
222 university origin, ranking, and gender had no effect on the performance difference  
223 (Table 1, Fig. 4*a–b*). In contrast, the difference in performance before and after  
224 promotion to full professor was not associated with the year of promotion, PhD  
225 university ranking, or gender, yet the difference tended to be higher for PIs with foreign  
226 degrees compared to those with Taiwanese degrees (Table 1, Fig. 4*c–d*).

227

228

## 229 **Discussion**

230 Overall, we showed that the academic performance of PIs before recruitment as new  
231 faculty members increased over years, whereas the performance before promotion to  
232 full professor remained relatively unchanged. We also found that the duration both  
233 before recruitment and before promotion increased in recent years. These results  
234 provide empirical evidence supporting the suspicion that publication requirements and  
235 expectations have risen over time in the field of ecology and evolutionary biology in  
236 Taiwan, in line with many academic job markets worldwide (Rawat and Meena 2014;  
237 Warren 2019).

238

239 The increase in academic performance of PIs before recruitment suggests that the  
240 academic job market might have become increasingly competitive over time, which is  
241 likely driven by a relatively lower demand for tenure-track professors compared to the  
242 supply of new PhDs (Larson et al. 2014). Consequently, the duration post-PhD may  
243 be prolonged if the applicants are not competitive enough. However, higher academic  
244 performance could help shorten the time to land a position. Therefore, it would be  
245 important for early-career researchers to home in on publications in order to  
246 demonstrate their competence for academic success. In contrast, the performance of  
247 PIs before promotion to full professor remained similar over years, suggesting that the  
248 requirements for promotion might not have changed much over time. Interestingly, the  
249 time to full professor has lengthened in recent years but was not affected by academic  
250 performance, possibly due to increasing consideration of accomplishments such as  
251 teaching and administrative services by employment institutes in addition to research  
252 outputs. Such different patterns in academic performance and career duration  
253 between recruitment and promotion phase are likely due to applicants facing

254 increasing competition with others during recruitment and thus higher performance  
255 would be advantageous for securing a position, whereas getting a promotion depends  
256 mainly on individual PI meeting the institutes' requirements rather than comparing with  
257 others' performance.

258

259 We found that the average performance of a new male PI was higher than that of a  
260 new female PI. This may result from higher standards for evaluating the suitability of  
261 a potential faculty member for males compared to females (Symonds et al. 2006).  
262 Alternatively, it could be due to employment institutes striving to recruit female  
263 applicants to enhance gender equity despite the likelihood of female applicants having  
264 a lower performance than their male competitors, which can be exacerbated by implicit  
265 bias and stereotype threats that females face in biological sciences (Salerno et al.  
266 2019). However, the performance expectations for promotion to full professor did not  
267 differ between male and female PIs, indicating that after recruitment, especially when  
268 gender equality is enhanced, individual performance is the key to further promotion  
269 regardless of gender. Contrary to a previous study showing that researchers from  
270 higher-ranked institutes become PIs faster compared to those from lower-ranked  
271 institutes (van Dijk et al. 2014), we found no evidence of PhD university origin and  
272 ranking influencing the career duration either before recruitment or before promotion.  
273 Instead, our results suggest that academic performance during PhD and/or post-PhD  
274 period may be more important in determining the academic success compared with  
275 the prestige of education itself.

276

277 The difference in performance before and after recruitment decreased over years.  
278 Specifically, PIs in earlier years had on average higher h-indexes after recruitment

279 than before recruitment, yet such a “performance boost” has declined in recent years.  
280 This could be due to increasing teaching and administrative demands of new PIs,  
281 reducing their time available for research. Surprisingly, we found that PIs performed  
282 consistently before and after recruitment regardless of their PhD university origin or  
283 ranking. However, PIs with domestic PhD degrees did show a decrease in  
284 performance after promotion to full professor compared to before promotion, whereas  
285 PIs with foreign PhD degrees had relatively consistent performance before and after  
286 promotion. One possible explanation is that the training and experiences from foreign  
287 universities may have equipped those PIs with greater professional abilities, which  
288 together with international connections and collaboration opportunities, help maintain  
289 their performance.

290

291 It is noteworthy that recruitment is a complicated process involving not only academic  
292 performance *per se* but also other considerations such as the suitability of applicants  
293 to the research areas of opening positions. Although our study showed increasing  
294 academic performance for recruitment over years, we do not intend to discourage the  
295 academic community with such results. Indeed, variations in h-index during  
296 recruitment phase indicate that it is still possible for an applicant with relatively low h-  
297 index to land a position. Moreover, besides research performance, other aspects of  
298 academic achievements, including teaching, mentoring, and social outreach, also  
299 constitute a significant part of a researcher’s career, and we stress that balancing  
300 these different aspects would be necessary for a more holistic professional  
301 development. Finally, our analyses were based on PIs in ecology and evolutionary  
302 biology. Since the nature of academic job markets can vary considerably among  
303 different fields of biology (Larson et al. 2014), the results should be interpreted

304 carefully when applied to the fields outside the scope of this study. In conclusion, our  
305 findings confirm that succeeding in academia has become more challenging, with  
306 publication requirements and career duration both increasing over years. In the face  
307 of increasingly competitive academic job markets, boosting performance is a key to  
308 career success in academia.  
309

## 310 **Statements and Declarations**

### 311 • **Competing interests**

312 The authors declare no competing interests.

313

### 314 • **Footnotes**

315 Please note that this manuscript has also been posted on *bioRxiv* (Hsu et al. 2022)  
316 at <https://www.biorxiv.org/content/10.1101/2022.01.31.478501v2>, following the  
317 Springer Nature preprint sharing policy. It has also been added to the reference  
318 list.

319

### 320 • **Funding**

321 No funding was received for conducting this study.

322

### 323 • **Authors' contributions**

324 G.-C.H. and S.-J.S. conceived the study; W.-J.L. and S.-J.S. collected the data;  
325 G.-C.H. and S.-J.S. analyzed the data. All authors were involved in writing the  
326 manuscript.

327

328



329 **References**

- 330 Acton, S.E., Bell, A.J., Toseland, C.P. & Twelvetrees, A. (2019). A survey of new PIs  
331 in the UK. *eLife*, 8.
- 332 Bates, D., Maechler, M., Bolker, B. & Walker, S. (2015). *Fitting linear mixed-effects*  
333 *models using lme4. R package version.*
- 334 Brischoux, F. & Angelier, F. (2015). Academia's never-ending selection for productivity.  
335 *Scientometrics*, 103, 333–336.
- 336 Chen, N. (2021). “Why should a ‘foreigner’ be better than me?”: preferential practices  
337 in junior academic faculty recruitment among mainland Chinese universities.  
338 *Tertiary Education and Management*, 1–25.
- 339 Cyranoski, D., Gilbert, N., Ledford, H., Nayar, A. & Yahia, M. (2011). Education: The  
340 PhD factory. *Nature*, 472, 276–279.
- 341 Garfield, E. (1996). What Is The Primordial Reference For The Phrase “Publish Or  
342 Perish”? *The Scientist*, 10, 11.
- 343 Ghaffarzadegan, N., Hawley, J., Larson, R. & Xue, Y. (2015). A Note on PhD  
344 Population Growth in Biomedical Sciences. *Systems Research and Behavioral*  
345 *Science*, 32, 402–405.
- 346 Glänzel, W. (2006). On the h-index - A mathematical approach to a new measure of  
347 publication activity and citation impact. *Scientometrics 2006 67:2*, 67, 315–321.
- 348 Hirsch, J.E. (2005). An index to quantify an individual's scientific research output.  
349 *Proceedings of the National Academy of Sciences*, 102, 16569–16572.
- 350 Hsu, G.-C., Lin, W.-J. & Sun, S.-J. Increased academic performance and prolonged  
351 career duration among Taiwanese academic faculty in ecology and evolutionary  
352 biology. *bioRxiv*, doi: <https://doi.org/10.1101/2022.01.31.478501>.

- 353 Larson, R.C., Ghaffarzadegan, N. & Xue, Y. (2014). Too many PhD graduates or too  
354 few academic job openings: The basic reproductive number  $R_0$  in academia.  
355 *Systems Research and Behavioral Science*, 31, 745–750.
- 356 Laurance, W.F., Useche, D.C., Laurance, S.G. & Bradshaw, C.J.A. (2013). Predicting  
357 Publication Success for Biologists. *BioScience*, 63, 817–823.
- 358 Lenth, R. v. (2021). emmeans: Estimated marginal means, aka least-squares means.  
359 R package version 1.7.1. *R Foundation for Statistical Computing*.
- 360 National Science Foundation. (2018). *Science and Engineering Indicators. NSB-2018-*  
361 *1*. Available at: <https://www.nsf.gov/statistics/seind/>. Last accessed 6 February  
362 2022.
- 363 Pauly, D. & Stergiou, K.I. (2005). Equivalence of results from two citation analyses:  
364 Thomson ISI's Citation Index and Google's Scholar service. *undefined*, 5, 33–35.
- 365 R Development Core Team. (2014). R: A language and environment for statistical  
366 computing. *R Foundation for Statistical Computing*.
- 367 Rawat, S. & Meena, S. (2014). Publish or perish: Where are we heading? *Journal of*  
368 *Research in Medical Sciences: The Official Journal of Isfahan University of*  
369 *Medical Sciences*, 19, 87.
- 370 Ryan Haley, M. (2012). Rank variability of the Publish or Perish metrics for economics  
371 and finance journals. <http://dx.doi.org/10.1080/13504851.2012.697115>, 20, 830–  
372 836.
- 373 Schillebeeckx, M., Maricque, B. & Lewis, C. (2013). The missing piece to changing the  
374 university culture. *Nature Biotechnology* 2013 31:10, 31, 938–941.
- 375 Shin, J.C. & Kehm, B.M. (2013). Institutionalization of world-class university in global  
376 competition. *Institutionalization of World-Class University in Global Competition*,  
377 1–301.

- 378 Swihart, R.K., Sundaram, M., Höök, T.O. & Dewoody, J.A. (2016). Factors affecting  
379 scholarly performance by wildlife and fisheries faculty. *The Journal of Wildlife*  
380 *Management*, 80, 563–572.
- 381 Symonds, M.R.E., Gemmell, N.J., Braisher, T.L., Gorringer, K.L. & Elgar, M.A. (2006).  
382 Gender Differences in Publication Output: Towards an Unbiased Metric of  
383 Research Performance. *PLOS ONE*, 1, e127.
- 384 van Dijk, D., Manor, O. & Carey, L.B. (2014). Publication metrics and success on the  
385 academic job market. *Current biology : CB*, 24.
- 386 Warren, J.R. (2019). How much do you have to publish to get a job in a top sociology  
387 department? Or to get tenure? Trends over a generation. *Sociological Science*,  
388 6, 172–196.
- 389 Witteman, H.O., Hendricks, M., Straus, S. & Tannenbaum, C. (2019). Are gender gaps  
390 due to evaluations of the applicant or the science? A natural experiment at a  
391 national funding agency. *The Lancet*, 393, 531–540.
- 392 Xue, Y. & Larson, R.C. (2015). STEM crisis or STEM surplus? Yes and yes. *Monthly*  
393 *labor review*, 2015.
- 394

## 395 Tables and Figures

Table 1. Results of the LMMs (type III sum of squares) on academic performance before recruitment/promotion (“Before” h-index), career duration before recruitment/promotion, and difference in performance before and after recruitment/promotion (“After” h-index – “Before” h-index)

| Response                                | Predictor                                     | $\chi^2$ | d.f. | <i>P</i> *        |
|-----------------------------------------|-----------------------------------------------|----------|------|-------------------|
| Academic performance (recruitment)      | Year of recruitment                           | 74.68    | 1    | <b>&lt; 0.001</b> |
|                                         | Gender                                        | 5.73     | 1    | <b>0.02</b>       |
|                                         | PhD university origin                         | 1.42     | 1    | 0.23              |
|                                         | PhD university ranking                        | 0.45     | 1    | 0.50              |
| Academic performance (promotion)        | Year of promotion                             | 0.97     | 1    | 0.32              |
|                                         | Gender                                        | 0.07     | 1    | 0.79              |
|                                         | PhD university origin                         | 0.06     | 1    | 0.81              |
|                                         | PhD university ranking                        | 1.06     | 1    | 0.30              |
| Duration (recruitment)                  | Year of recruitment                           | 43.08    | 1    | <b>&lt; 0.001</b> |
|                                         | Academic performance                          | 6.10     | 1    | <b>0.01</b>       |
|                                         | Gender                                        | 0.78     | 1    | 0.38              |
|                                         | PhD university origin                         | 1.01     | 1    | 0.32              |
|                                         | PhD university ranking                        | 1.82     | 1    | 0.18              |
|                                         | Academic performance x<br>Year of recruitment | 6.06     | 1    | <b>0.01</b>       |
| Duration (promotion)                    | Year of promotion                             | 7.03     | 1    | <b>0.01</b>       |
|                                         | Academic performance                          | 1.87     | 1    | 0.17              |
|                                         | Gender                                        | 3.18     | 1    | 0.08              |
|                                         | PhD university origin                         | 1.96     | 1    | 0.16              |
|                                         | PhD university ranking                        | 0.62     | 1    | 0.43              |
| Difference in performance (recruitment) | Year of recruitment                           | 15.40    | 1    | <b>&lt; 0.001</b> |
|                                         | Gender                                        | 0.06     | 1    | 0.80              |
|                                         | PhD university origin                         | 0.42     | 1    | 0.52              |
|                                         | PhD university ranking                        | 0.38     | 1    | 0.54              |
| Difference in performance (promotion)   | Year of promotion                             | 2.96     | 1    | 0.09              |
|                                         | Gender                                        | 0.81     | 1    | 0.37              |
|                                         | PhD university origin                         | 3.48     | 1    | 0.06              |
|                                         | PhD university ranking                        | 0.51     | 1    | 0.47              |

\* *P* values < 0.05 are highlighted in bold.

396 **Fig. 1** Distribution of the universities from which the 145 PIs obtained their PhD  
397 degrees. Percentages of PhD degrees obtained from the USA, Taiwan, and the UK  
398 are as noted; “Other” includes all other countries with percentages less than 4.0%

399

400 **Fig. 2** Distribution of the ranking of universities from which PIs obtained their PhD  
401 degrees. Dashed lines indicate medians of university ranking for Taiwanese (252) and  
402 foreign (108) PhD degrees

403

404 **Fig. 3** Temporal variations in academic performance (*a & b*) and career duration (*c &*  
405 *d*) before recruitment and promotion. Each point represents an individual PI, with  
406 points in (*c*) colored by “Before” h-index. Solid/dashed lines represent significant/non-  
407 significant relationships predicted from the LMMs; shaded areas indicate 95%  
408 confidence intervals

409

410 **Fig. 4** Difference in academic performance before and after recruitment (*a & b*) and  
411 promotion (*c & d*) (“After” h-index – “Before” h-index) in relation to the year of  
412 recruitment/promotion and PhD university origin. Each point represents an individual  
413 PI. Solid/dashed line represents significant/non-significant relationships predicted  
414 from the LMMs; shaded areas indicate 95% confidence intervals

415

416 **Fig. 1**

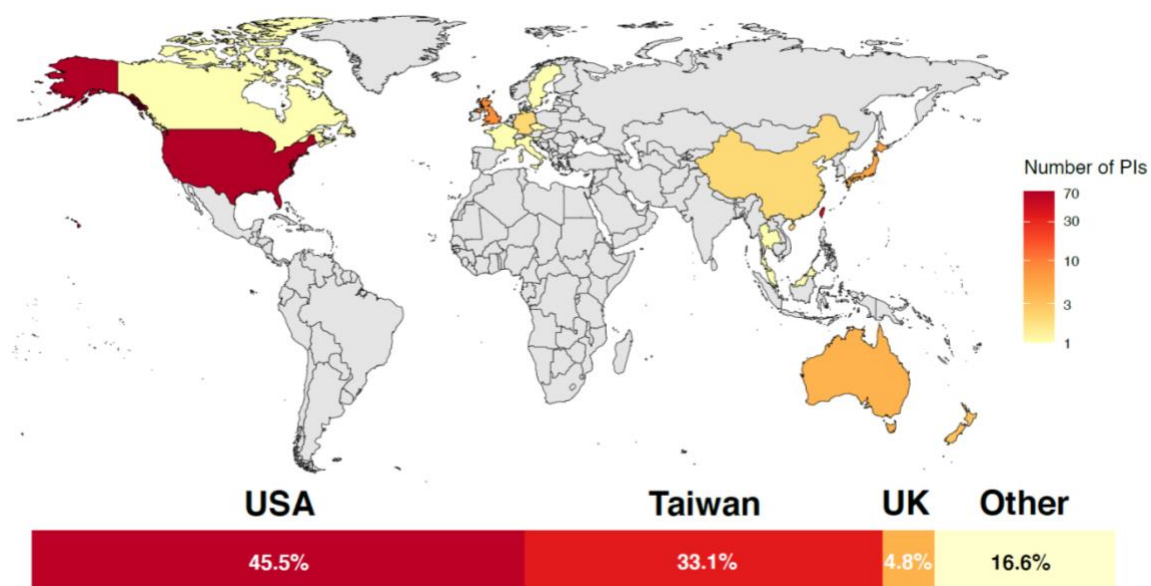

417

418

419 **Fig. 2**

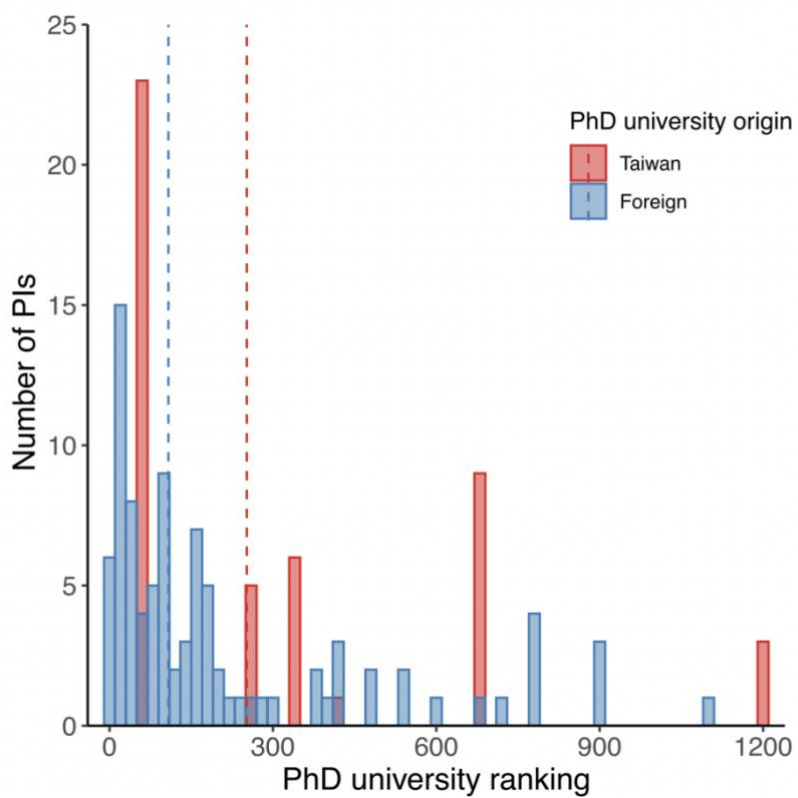

420

421

422

423 **Fig. 3**

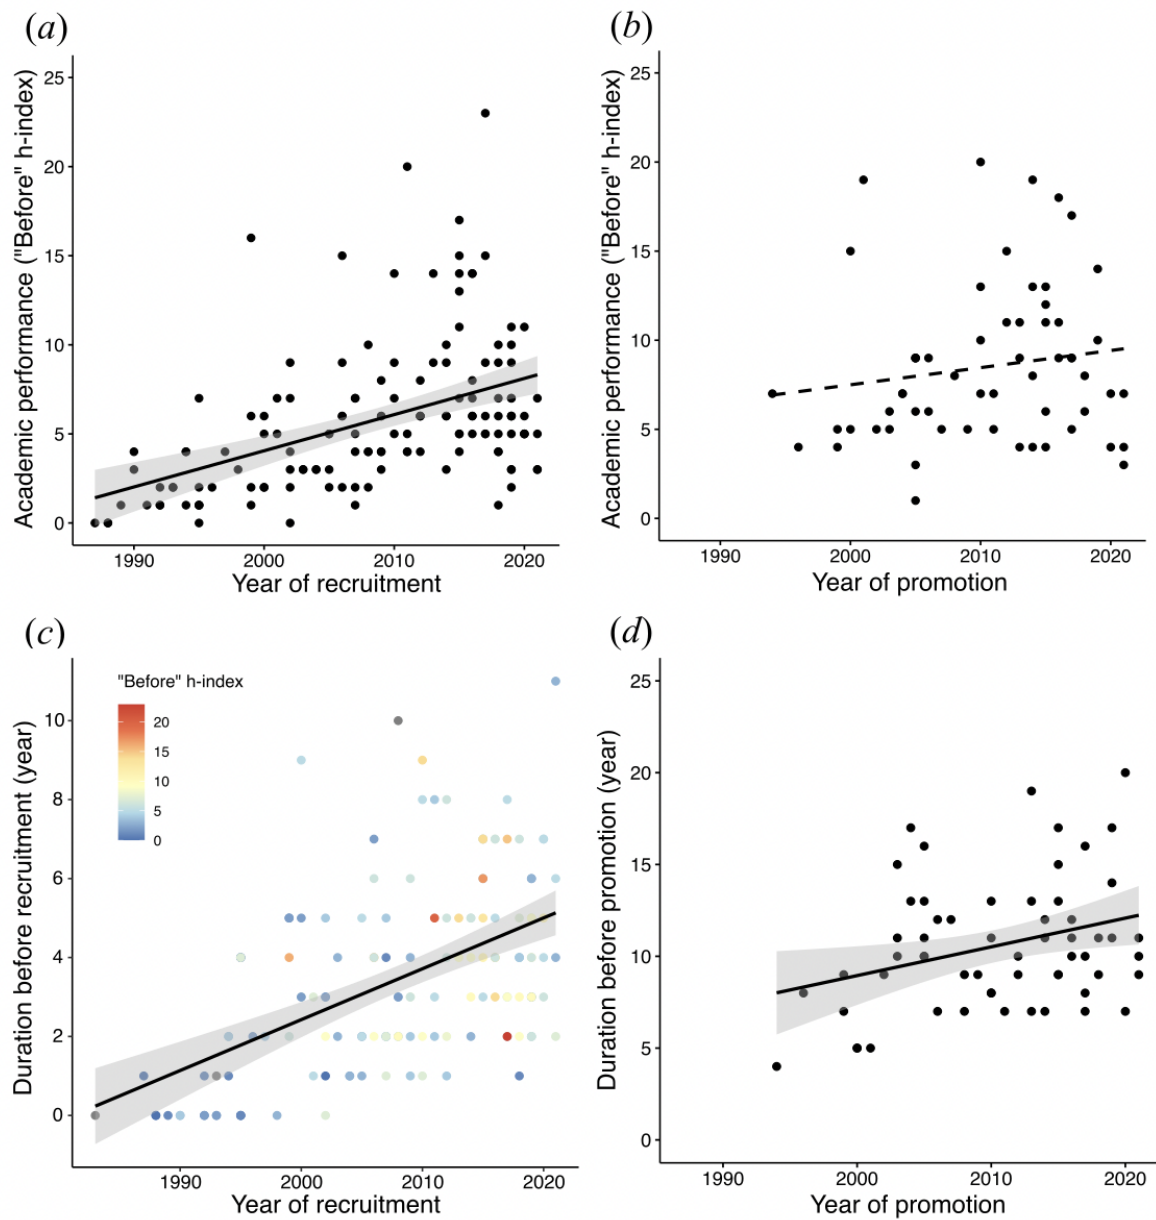

424



425 **Fig. 4**

426

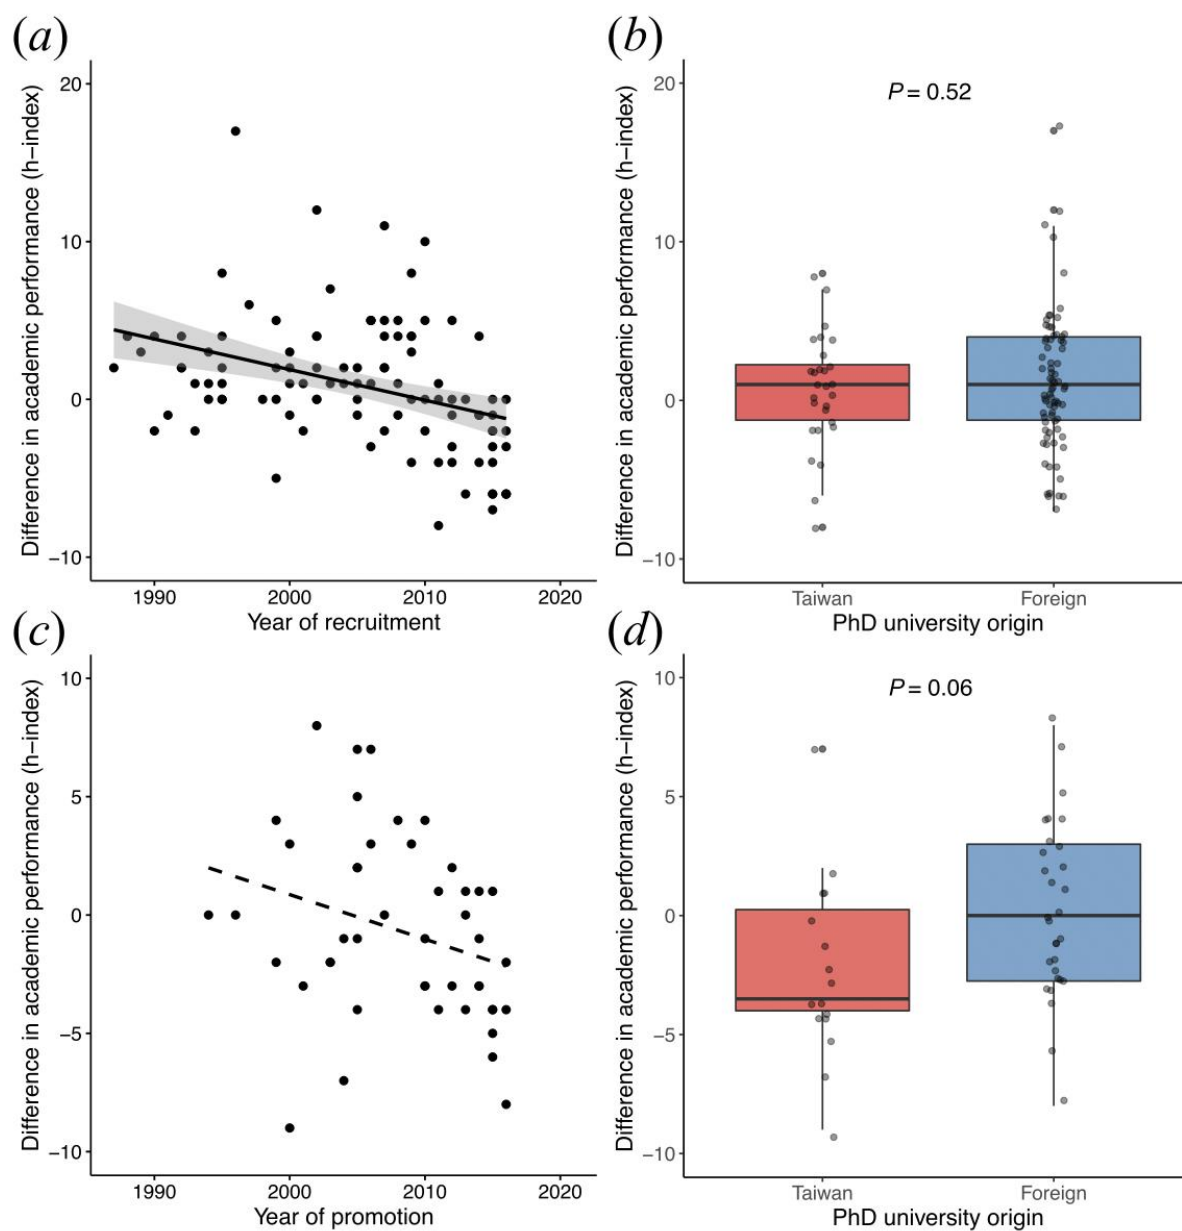

427

428

429
